# Supplementary material for: HLA genotype-clinical phenotype correlations in multiple sclerosis and neuromyelitis optica spectrum disorders based on Japan MS/NMOSD Biobank data
Source: PubMed Central journal article supplement (PMC7804194; doi:10.1038/s41598-020-79833-7), 2021-01-12
Supplement: 41598_2020_79833_MOESM1_ESM.pdf [file 41598_2020_79833_MOESM1_ESM.pdf]

## **Supplementary Information**

### ***HLA* genotype-clinical phenotype correlations in multiple sclerosis and neuromyelitis optica spectrum disorders based on Japan MS/NMOSD Biobank data**

Mitsuru Watanabe, Yuri Nakamura, Shinya Sato, Masaaki Niino, Hikoaki Fukaura, Masami Tanaka, Hirofumi Ochi, Takashi Kanda, Yukio Takeshita, Takanori Yokota, Yoichiro Nishida, Makoto Matsui, Shigemi Nagayama, Susumu Kusunoki, Katsuichi Miyamoto, Masanori Mizuno, Izumi Kawachi, Etsuji Saji, Takashi Ohashi, Shun Shimohama, Shin Hisahara, Kazutoshi Nishiyama, Takahiro Iizuka, Yuji Nakatsuji, Tatsusada Okuno, Kazuhide Ochi, Akio Suzumura, Ken Yamamoto, Yuji Kawano, Shoji Tsuji, Makoto Hirata, Ryuichi Sakate, Tomonori Kimura, Yuko Shimizu, Akiko Nagaishi, Kazumasa Okada, Fumie Hayashi, Ayako Sakoda, Katsuhisa Masaki, Koji Shinoda, Noriko Isobe, Takuya Matsushita & Jun-ichi Kira\*

**Supplementary Table S1. Comparison of the clinical characteristics of MS patients between northern and southern Japan.**

|                                             | MS                        |                              | <i>p</i>        |
|---------------------------------------------|---------------------------|------------------------------|-----------------|
|                                             | Northern<br>(n = 125)     | Southern<br>(n = 403)        |                 |
| Female                                      | 88/125 (70.4)             | 280/403 (69.5)               | 0.912           |
| Age at registration, y                      | 40 [35-48]                | 41 [34-49]                   | 0.481           |
| Course (RR/SP/PP)                           | 102/23/0<br>(81.6/18.4/0) | 336/47/19<br>(83.6/11.7/4.7) | <b>0.001</b>    |
| Age at onset, y                             | 30 [23-38]                | 30 [23-39]                   | 0.812           |
| Duration of disease, y                      | 7.5 [4.1-14.2]            | 9.3 [4.8-15.1]               | 0.297           |
| Number of relapses                          | 1 [1-2]                   | 2 [1-4]                      | <b>&lt;.001</b> |
| Annualized relapse rate                     | 0.21 [0.08-0.42]          | 0.29 [0.14-0.60]             | <b>0.001</b>    |
| Lesion sites                                |                           |                              |                 |
| Optic nerve (optic neuritis)                | 45/123 (36.6)             | 146/396 (36.9)               | 1               |
| Cerebrum                                    | 96/125 (76.8)             | 249/396 (62.9)               | <b>0.005</b>    |
| Cerebellum                                  | 26/121 (21.5)             | 83/396 (21.0)                | 0.899           |
| Brainstem                                   | 63/122 (51.6)             | 191/395 (48.4)               | 0.536           |
| Spinal cord                                 | 93/124 (75.0)             | 303/396 (76.5)               | 0.719           |
| Patients with family history of MS or NMOSD | 0/125 (0)                 | 9/392 (2.3)                  | 0.122           |
| CSF IgG abnormality                         | 76/102 (74.5)             | 233/338 (68.9)               | 0.324           |
| Presence of OCBs                            | 60/94 (63.8)              | 202/317 (63.7)               | 1               |
| High IgG index (> 0.658)                    | 52/77 (67.5)              | 160/297 (53.9)               | <b>0.039</b>    |
| Anti-AQP4 Ab positivity                     | 1/109 (0.9)               | 3/345 (0.9)                  | 1               |
| EDSS score                                  | 2.0 [1.0-4.5]             | 2.0 [1.0-3.5]                | 0.345           |
| PI                                          | 0.25 [0.10-0.52]          | 0.21 [0.06-0.48]             | 0.117           |
| MSSS                                        | 3.18 [0.94-6.25]          | 2.44 [0.67-5.68]             | 0.133           |
| FS score*                                   |                           |                              |                 |
| Visual functions                            | 0 [0-0]                   | 0 [0-1]                      | 0.175           |
| Brainstem functions                         | 0 [0-2]                   | 0 [0-2]                      | 0.074           |
| Pyramidal functions                         | 0 [0-3]                   | 1 [0-3]                      | 0.156           |
| Cerebellar functions                        | 0 [0-2]                   | 0 [0-2]                      | <b>0.050</b>    |
| Sensory functions                           | 0 [0-2]                   | 0 [0-3]                      | 0.144           |
| Bowel and bladder functions                 | 0 [0-2]                   | 0 [0-1]                      | 0.881           |
| Cerebral functions                          | 0 [0-1]                   | 0 [0-1]                      | 0.514           |

|                                          |               |                |              |
|------------------------------------------|---------------|----------------|--------------|
| Episodes of                              |               |                |              |
| bilateral optic neuritis                 | 7/123 (5.7)   | 20/393 (5.1)   | 0.817        |
| transverse myelitis                      | 3/124 (2.4)   | 38/389 (9.8)   | <b>0.007</b> |
| MRI                                      |               |                |              |
| Huge brain lesion > 3cm                  | 2/125 (1.6)   | 6/397 (1.5)    | 1            |
| LESCL                                    | 1/125 (0.8)   | 9/398 (2.3)    | 0.464        |
| Benign course                            |               |                |              |
| EDSS ≤ 2 and disease duration ≥ 10y      | 19/52 (36.5)  | 82/182 (45.1)  | 0.341        |
| EDSS ≤ 3 and disease duration ≥ 10y      | 21/52 (40.4)  | 106/182 (58.2) | <b>0.027</b> |
| AID/autoantibodies                       | 9/125 (7.2)   | 68/369 (18.4)  | <b>0.003</b> |
| AID                                      |               |                |              |
| Sjögren syndrome                         | 0/125 (0)     | 7/366 (1.9)    | 0.199        |
| Thyroid diseases<br>(Basedow, Hashimoto) | 5/125 (4.0)   | 10/366 (2.7)   | 0.547        |
| Autoantibodies                           |               |                |              |
| ANA                                      | 0/123 (0)     | 26/361 (7.2)   | <b>0.001</b> |
| Anti-SS-A / SS-B Ab                      | 0/123 (0)     | 14/361 (3.9)   | <b>0.026</b> |
| Anti-Tg / TPO / TSHR Ab                  | 5/123 (4.1)   | 21/361 (5.8)   | 0.643        |
| PSL/IS                                   |               |                |              |
| PSL                                      | 16/124 (12.9) | 41/385 (10.6)  | 0.513        |
| IS                                       | 3/124 (2.4)   | 21/392 (5.4)   | 0.225        |
| DMD                                      |               |                |              |
| IFN-β                                    | 90/125 (72.0) | 271/403 (67.2) | 0.379        |
| fingolimod                               | 55/125 (44.0) | 162/400 (40.5) | 0.533        |

Values are median [interquartile ranges] or count (%). Bold values indicate significant differences.

\*In the section of functional system scores, values are median [10-90th percentile].

Ab, antibody; AID, autoimmune disease; ANA, anti-nuclear antibody; AQP4, aquaporin 4; CSF, cerebrospinal fluid; EDSS, expanded disability status scale; FS, functional system; IFN, interferon; IS, immunosuppressants; LESCL, longitudinally extensive spinal cord lesion; MS, multiple sclerosis; MSSS, multiple sclerosis severity score; NA, not applicable; NMOSD, neuromyelitis optica spectrum disorders; OCBs, oligoclonal IgG bands; PI, progression index; PP, primary progressive; PSL, prednisolone; RR, relapsing-remitting; SP, secondary progressive; Tg, thyroglobulin; TPO, thyroid peroxidase; TSHR, thyroid stimulating hormone receptor; y, years.

**Supplementary Table S2. Comparison of the clinical characteristics between MS patients with and without *HLA-DRB1\*04:05* in northern Japan.**

|                                             | <i>HLA-DRB1*04:05</i>    |                          | <i>p</i>        |
|---------------------------------------------|--------------------------|--------------------------|-----------------|
|                                             | Positive<br>(n = 51)     | Negative<br>(n = 74)     |                 |
| Female                                      | 36/51 (70.6)             | 52/74 (70.3)             | 1               |
| Age at registration, y                      | 40 [33-50]               | 40 [35-47]               | 0.777           |
| Course (RR/SP/PP)                           | 39/12/0<br>(76.5/23.5/0) | 63/11/0<br>(85.1/14.9/0) | 0.246           |
| Age at onset, y                             | 30 [23-38]               | 30 [23-39]               | 0.895           |
| Duration of disease, y                      | 8.7 [5.6-15.1]           | 6.6 [3.8-13.7]           | 0.176           |
| Number of relapses                          | 1 [1-3]                  | 1 [1-2]                  | 0.462           |
| Annualized relapse rate                     | 0.17 [0.08-0.41]         | 0.24 [0.07-0.43]         | 0.564           |
| Lesion sites                                |                          |                          |                 |
| Optic nerve (optic neuritis)                | 21/50 (42.0)             | 24/73 (32.9)             | 0.343           |
| Cerebrum                                    | 39/51 (76.5)             | 57/74 (77.0)             | 1               |
| Cerebellum                                  | 11/49 (22.4)             | 15/72 (20.8)             | 0.826           |
| Brainstem                                   | 24/49 (49.0)             | 39/73 (53.4)             | 0.713           |
| Spinal cord                                 | 42/51 (82.4)             | 51/73 (69.9)             | 0.142           |
| Patients with family history of MS or NMOSD | 0/51 (0)                 | 0/74 (0)                 | NA              |
| CSF IgG abnormality                         | 25/42 (59.5)             | 51/60 (85.0)             | <b>0.005</b>    |
| Presence of OCBs                            | 16/39 (41.0)             | 44/55 (80.0)             | <b>&lt;.001</b> |
| High IgG index (> 0.658)                    | 16/33 (48.5)             | 36/44 (81.8)             | <b>0.003</b>    |
| Anti-AQP4 Ab positivity                     | 0/44 (0)                 | 1/65 (1.5)               | 1               |
| EDSS score                                  | 3.0 [1.0-5.0]            | 2.0 [1.0-4.0]            | 0.183           |
| PI                                          | 0.24 [0.12-0.53]         | 0.27 [0.08-0.50]         | 0.910           |
| MSSS                                        | 4.83 [1.04-6.82]         | 2.85 [0.73-5.97]         | 0.246           |
| FS score*                                   |                          |                          |                 |
| Visual functions                            | 0 [0-1]                  | 0 [0-0]                  | 0.102           |
| Brainstem functions                         | 0 [0-2]                  | 0 [0-1]                  | 0.296           |
| Pyramidal functions                         | 1 [0-3]                  | 0 [0-3]                  | <b>0.029</b>    |
| Cerebellar functions                        | 0 [0-2]                  | 0 [0-2]                  | 0.519           |
| Sensory functions                           | 0 [0-2]                  | 0 [0-2]                  | 0.614           |
| Bowel and bladder functions                 | 0 [0-2]                  | 0 [0-2]                  | 0.537           |
| Cerebral functions                          | 0 [0-1]                  | 0 [0-0]                  | 0.331           |

|                                          |              |              |              |
|------------------------------------------|--------------|--------------|--------------|
| Episodes of                              |              |              |              |
| bilateral optic neuritis                 | 4/50 (8.0)   | 3/73 (4.1)   | 0.441        |
| transverse myelitis                      | 0/50 (0)     | 3/74 (4.1)   | 0.272        |
| MRI                                      |              |              |              |
| Huge brain lesion > 3cm                  | 1/51 (2.0)   | 1/74 (1.4)   | 1            |
| LESCL                                    | 0/51 (0)     | 1/74 (1.4)   | 1            |
| Benign course                            |              |              |              |
| EDSS ≤ 2 and disease duration ≥ 10y      | 8/25 (32.0)  | 11/27 (40.7) | 0.574        |
| EDSS ≤ 3 and disease duration ≥ 10y      | 9/25 (36.0)  | 12/27 (44.4) | 0.582        |
| AID/autoantibodies                       | 4/51 (7.8)   | 5/74 (6.8)   | 1            |
| AID                                      | 3/51 (5.9)   | 5/74 (6.8)   | 1            |
| Sjögren syndrome                         | 0/51 (0)     | 0/74 (0)     |              |
| Thyroid diseases<br>(Basedow, Hashimoto) | 3/51 (5.9)   | 2/74 (2.7)   | 0.397        |
| Autoantibodies                           | 4/51 (7.8)   | 2/72 (2.8)   | 0.231        |
| ANA                                      | 0/51 (0)     | 0/72 (0)     | NA           |
| Anti-SS-A / SS-B Ab                      | 0/51 (0)     | 0/72 (0)     | NA           |
| Anti-Tg / TPO / TSHR Ab                  | 4/51 (7.8)   | 1/72 (1.4)   | 0.159        |
| PSL/IS                                   | 5/51 (9.8)   | 11/74 (14.9) | 0.587        |
| PSL                                      | 5/50 (10.0)  | 11/74 (14.9) | 0.587        |
| IS                                       | 0/50 (0)     | 3/74 (4.1)   | 0.272        |
| DMD                                      | 49/51 (96.1) | 66/74 (89.2) | 0.198        |
| IFN-β                                    | 40/51 (78.4) | 50/74 (67.6) | 0.226        |
| fingolimod                               | 30/51 (58.8) | 25/74 (33.8) | <b>0.006</b> |

Values are median [interquartile ranges] or count (%). Bold values indicate significant differences.

\*In the section of functional system scores, values are median [10-90th percentile].

Ab, antibody; AID, autoimmune disease; ANA, anti-nuclear antibody; AQP4, aquaporin 4; CSF, cerebrospinal fluid; EDSS, expanded disability status scale; FS, functional system; IFN, interferon; IS, immunosuppressants; LESCL, longitudinally extensive spinal cord lesion; MS, multiple sclerosis; MSSS, multiple sclerosis severity score; NA, not applicable; NMOSD, neuromyelitis optica spectrum disorders; OCBs, oligoclonal IgG bands; PI, progression index; PP, primary progressive; PSL, prednisolone; RR, relapsing-remitting; SP, secondary progressive; Tg, thyroglobulin; TPO, thyroid peroxidase; TSHR, thyroid stimulating hormone receptor; y, years.

**Supplementary Table S3. Comparison of the clinical characteristics between MS patients with and without *HLA-DRB1\*04:05* in southern Japan.**

|                                             | <i>HLA-DRB1*04:05</i>        |                             | <i>p</i>        |
|---------------------------------------------|------------------------------|-----------------------------|-----------------|
|                                             | Positive<br>(n = 163)        | Negative<br>(n = 240)       |                 |
| Female                                      | 110/163 (67.5)               | 170/240 (70.8)              | 0.509           |
| Age at registration, y                      | 41 [32-52]                   | 42 [35-48]                  | 0.740           |
| Course (RR/SP/PP)                           | 135/18/10<br>(82.8/11.0/6.1) | 201/29/9<br>(84.1/12.1/3.8) | 0.537           |
| Age at onset, y                             | 28 [22-38]                   | 32 [25-39]                  | <b>0.009</b>    |
| Duration of disease, y                      | 10.3 [5.8-18]                | 8.7 [4.4-14.1]              | <b>0.012</b>    |
| Number of relapses                          | 3 [1-5]                      | 2 [1-4]                     | 0.167           |
| Annualized relapse rate                     | 0.29 [0.13-0.57]             | 0.29 [0.15-0.64]            | 0.565           |
| Lesion sites                                |                              |                             |                 |
| Optic nerve (optic neuritis)                | 68/162 (42.0)                | 78/234 (33.3)               | 0.090           |
| Cerebrum                                    | 103/161 (64.0)               | 146/235 (62.1)              | 0.751           |
| Cerebellum                                  | 37/161 (23.0)                | 46/235 (19.6)               | 0.452           |
| Brainstem                                   | 87/161 (54.0)                | 104/234 (44.4)              | 0.066           |
| Spinal cord                                 | 121/160 (75.6)               | 182/236 (77.1)              | 0.809           |
| Patients with family history of MS or NMOSD | 5/160 (3.1)                  | 4/232 (1.7)                 | 0.496           |
| CSF IgG abnormality                         | 78/137 (56.9)                | 155/201 (77.1)              | <b>&lt;.001</b> |
| Presence of OCBs                            | 64/127 (50.4)                | 138/190 (72.6)              | <b>&lt;.001</b> |
| High IgG index (> 0.658)                    | 48/118 (40.7)                | 112/179 (62.6)              | <b>&lt;.001</b> |
| Anti-AQP4 Ab positivity                     | 1/138 (0.7)                  | 2/207 (1.0)                 | 1               |
| EDSS score                                  | 2.0 [1.0-4.0]                | 2.0 [1.0-3.5]               | 0.823           |
| PI                                          | 0.18 [0.05-0.39]             | 0.24 [0.08-0.49]            | 0.074           |
| MSSS                                        | 2.13 [0.53-5.5]              | 2.82 [0.82-5.75]            | 0.137           |
| FS score*                                   |                              |                             |                 |
| Visual functions                            | 0 [0-2]                      | 0 [0-0]                     | <b>0.003</b>    |
| Brainstem functions                         | 0 [0-2]                      | 0 [0-2]                     | 0.649           |
| Pyramidal functions                         | 1 [0-3]                      | 1 [0-3]                     | 0.380           |
| Cerebellar functions                        | 0 [0-3]                      | 0 [0-2]                     | 0.207           |
| Sensory functions                           | 0 [0-3]                      | 0 [0-3]                     | 0.994           |
| Bowel and bladder functions                 | 0 [0-1]                      | 0 [0-1]                     | 0.938           |
| Cerebral functions                          | 0 [0-1]                      | 0 [0-1]                     | 0.786           |

|                                          |                |                |       |
|------------------------------------------|----------------|----------------|-------|
| Episodes of                              |                |                |       |
| bilateral optic neuritis                 | 11/158 (7)     | 9/235 (3.8)    | 0.241 |
| transverse myelitis                      | 16/156 (10.3)  | 22/233 (9.4)   | 0.862 |
| MRI                                      |                |                |       |
| Huge brain lesion > 3cm                  | 4/161 (2.5)    | 2/236 (0.8)    | 0.228 |
| LESCL                                    | 3/163 (1.8)    | 6/235 (2.6)    | 0.743 |
| Benign course                            |                |                |       |
| EDSS ≤ 2 and disease duration ≥ 10y      | 41/86 (47.7)   | 41/96 (42.7)   | 0.552 |
| EDSS ≤ 3 and disease duration ≥ 10y      | 49/86 (57.0)   | 57/96 (59.4)   | 0.765 |
| AID/autoantibodies                       | 31/149 (20.8)  | 37/220 (16.8)  | 0.341 |
| AID                                      | 9/147 (6.1)    | 14/219 (6.4)   | 1     |
| Sjögren syndrome                         | 1/147 (0.7)    | 6/219 (2.7)    | 0.250 |
| Thyroid diseases<br>(Basedow, Hashimoto) | 3/147 (2)      | 7/219 (3.2)    | 0.746 |
| Autoantibodies                           | 27/145 (18.6)  | 33/216 (15.3)  | 0.471 |
| ANA                                      | 15/145 (10.3)  | 11/216 (5.1)   | 0.064 |
| Anti-SS-A / SS-B Ab                      | 4/145 (2.8)    | 10/216 (4.6)   | 0.419 |
| Anti-Tg / TPO / TSHR Ab                  | 9/145 (6.2)    | 12/216 (5.6)   | 0.821 |
| PSL/IS                                   | 23/161 (14.3)  | 30/240 (12.5)  | 0.653 |
| PSL                                      | 17/155 (11.0)  | 24/230 (10.4)  | 0.868 |
| IS                                       | 11/159 (6.9)   | 10/233 (4.3)   | 0.264 |
| DMD                                      | 136/163 (83.4) | 208/240 (86.7) | 0.391 |
| IFN-β                                    | 104/163 (63.8) | 167/240 (69.6) | 0.236 |
| fingolimod                               | 60/161 (37.3)  | 102/239 (42.7) | 0.300 |

Values are median [interquartile ranges] or count (%). Bold values indicate significant differences.

\*In the section of functional system scores, values are median [10-90th percentile].

Ab, antibody; AID, autoimmune disease; ANA, anti-nuclear antibody; AQP4, aquaporin 4; CSF, cerebrospinal fluid; EDSS, expanded disability status scale; FS, functional system; IFN, interferon; IS, immunosuppressants; LESCL, longitudinally extensive spinal cord lesion; MS, multiple sclerosis; MSSS, multiple sclerosis severity score; NMOSD, neuromyelitis optica spectrum disorders; OCBs, oligoclonal IgG bands; PI, progression index; PP, primary progressive; PSL, prednisolone; RR, relapsing-remitting; SP, secondary progressive; Tg, thyroglobulin; TPO, thyroid peroxidase; TSHR, thyroid stimulating hormone receptor; y, years.

**Supplementary Table S4. Comparison of the clinical characteristics between MS patients with and without *HLA-DRB1\*04:05* in southern Japan excluding PPMS patients.**

|                                             | <i>HLA-DRB1*04:05</i> |                       | <i>p</i>        |
|---------------------------------------------|-----------------------|-----------------------|-----------------|
|                                             | Positive<br>(n = 153) | Negative<br>(n = 231) |                 |
| Female                                      | 108/153 (70.6)        | 165/231 (71.4)        | 0.909           |
| Age at registration, y                      | 41 [32-52]            | 41 [35-48]            | 0.647           |
| Course (RR/SP)                              | 135/18<br>(88.2/11.8) | 201/29<br>(87.4/12.6) | 0.874           |
| Age at onset, y                             | 27 [21-38]            | 32 [25-39]            | <b>0.002</b>    |
| Duration of disease, y                      | 10.9 [6.0-18.5]       | 8.5 [4.1-14.1]        | <b>0.003</b>    |
| Number of relapses                          | 3 [1-5]               | 2 [1-4]               | 0.083           |
| Annualized relapse rate                     | 0.29 [0.16-0.59]      | 0.30 [0.15-0.65]      | 0.748           |
| Lesion sites                                |                       |                       |                 |
| Optic nerve (optic neuritis)                | 67/153 (43.8)         | 77/227 (33.9)         | 0.053           |
| Cerebrum                                    | 99/152 (65.1)         | 141/228 (61.8)        | 0.587           |
| Cerebellum                                  | 34/152 (22.4)         | 43/228 (18.9)         | 0.436           |
| Brainstem                                   | 83/152 (54.6)         | 100/227 (44.1)        | <b>0.047</b>    |
| Spinal cord                                 | 115/151 (76.2)        | 176/229 (76.9)        | 0.902           |
| Patients with family history of MS or NMOSD | 5/150 (3.3)           | 4/223 (1.8)           | 0.494           |
| CSF IgG abnormality                         | 73/127 (57.5)         | 147/192 (76.6)        | <b>0.001</b>    |
| Presence of OCBs                            | 59/118 (50.0)         | 130/181 (71.8)        | <b>&lt;.001</b> |
| High IgG index (> 0.658)                    | 44/108 (40.7)         | 106/172 (61.6)        | <b>0.001</b>    |
| Anti-AQP4 Ab positivity                     | 1/129 (0.8)           | 2/198 (1.0)           | 1               |
| EDSS score                                  | 1.5 [1.0-3.5]         | 2.0 [1.0-3.0]         | 0.601           |
| PI                                          | 0.16 [0.05-0.34]      | 0.23 [0.07-0.48]      | <b>0.022</b>    |
| MSSS                                        | 1.98 [0.51-4.46]      | 2.65 [0.76-5.42]      | <b>0.050</b>    |
| FS score*                                   |                       |                       |                 |
| Visual functions                            | 0 [0-2]               | 0 [0-0]               | <b>0.001</b>    |
| Brainstem functions                         | 0 [0-2]               | 0 [0-2]               | 0.867           |
| Pyramidal functions                         | 1 [0-3]               | 1 [0-3]               | 0.181           |
| Cerebellar functions                        | 0 [0-3]               | 0 [0-2]               | 0.330           |
| Sensory functions                           | 0 [0-3]               | 0 [0-3]               | 0.841           |
| Bowel and bladder functions                 | 0 [0-1]               | 0 [0-1]               | 0.809           |
| Cerebral functions                          | 0 [0-1]               | 0 [0-1]               | 0.920           |

|                                          |                |                |       |
|------------------------------------------|----------------|----------------|-------|
| Episodes of                              |                |                |       |
| bilateral optic neuritis                 | 10/148 (6.8)   | 9/228 (3.9)    | 0.237 |
| transverse myelitis                      | 14/147 (9.5)   | 22/225 (9.8)   | 1     |
| MRI                                      |                |                |       |
| Huge brain lesion > 3cm                  | 3/151 (2.0)    | 2/228 (0.9)    | 0.391 |
| LESCL                                    | 3/153 (2.0)    | 6/226 (2.7)    | 0.745 |
| Benign course                            |                |                |       |
| EDSS ≤ 2 and disease duration ≥ 10y      | 41/84 (48.8)   | 41/90 (45.6)   | 0.761 |
| EDSS ≤ 3 and disease duration ≥ 10y      | 49/84 (58.3)   | 57/90 (63.3)   | 0.536 |
| AID/autoantibodies                       | 30/140 (21.4)  | 36/212 (17.0)  | 0.330 |
| AID                                      | 9/138 (6.5)    | 14/211 (6.6)   | 1     |
| Sjögren syndrome                         | 1/138 (0.7)    | 6/211 (2.8)    | 0.252 |
| Thyroid diseases<br>(Basedow, Hashimoto) | 3/138 (2.2)    | 7/211 (3.3)    | 0.746 |
| Autoantibodies                           | 26/136 (19.1)  | 32/208 (15.4)  | 0.380 |
| ANA                                      | 14/136 (10.3)  | 11/208 (5.3)   | 0.092 |
| Anti-SS-A / SS-B Ab                      | 3/136 (2.2)    | 9/208 (4.3)    | 0.377 |
| Anti-Tg / TPO / TSHR Ab                  | 9/136 (6.6)    | 12/208 (5.8)   | 0.819 |
| PSL/IS                                   | 21/151 (13.9)  | 29/231 (12.6)  | 0.757 |
| PSL                                      | 16/145 (11)    | 23/221 (10.4)  | 0.864 |
| IS                                       | 10/149 (6.7)   | 10/224 (4.5)   | 0.357 |
| DMD                                      | 127/153 (83.0) | 201/231 (87.0) | 0.303 |
| IFN-β                                    | 98/153 (64.1)  | 162/231 (70.1) | 0.222 |
| fingolimod                               | 56/151 (37.1)  | 99/230 (43.0)  | 0.286 |

Values are median [interquartile ranges] or count (%). Bold values indicate significant differences.

\*In the section of functional system scores, values are median [10-90th percentile].

Ab, antibody; AID, autoimmune disease; ANA, anti-nuclear antibody; AQP4, aquaporin 4; CSF, cerebrospinal fluid; EDSS, expanded disability status scale; FS, functional system; IFN, interferon; IS, immunosuppressants; LESCL, longitudinally extensive spinal cord lesion; MS, multiple sclerosis; MSSS, multiple sclerosis severity score; NMOSD, neuromyelitis optica spectrum disorders; OCBs, oligoclonal IgG bands; PI, progression index; PPMS, primary progressive multiple sclerosis; PSL, prednisolone; RR, relapsing-remitting; SP, secondary progressive; Tg, thyroglobulin; TPO, thyroid peroxidase; TSHR, thyroid stimulating hormone receptor; y, years.

**Supplementary Table S5. Comparison of the clinical characteristics of MS patients with *HLA-DRB1\*04:05* between northern and southern Japan excluding PPMS patients.**

|                                             | <b>MS with <i>HLA-DRB1*04:05</i></b> |                               | <i>p</i>        |
|---------------------------------------------|--------------------------------------|-------------------------------|-----------------|
|                                             | <b>Northern<br/>(n = 51)</b>         | <b>Southern<br/>(n = 153)</b> |                 |
| Female                                      | 36/51 (70.6)                         | 108/153 (70.6)                | 1               |
| Age at registration, y                      | 40 [33-50]                           | 41 [32-52]                    | 0.937           |
| Course (RR/SP)                              | 39/12<br>(76.5/23.5)                 | 135/18<br>(88.2/11.8)         | 0.065           |
| Age at onset, y                             | 30 [23-38]                           | 27 [21-38]                    | 0.320           |
| Duration of disease, y                      | 8.7 [5.6-15.1]                       | 10.9 [6.0-18.5]               | 0.254           |
| Number of relapses                          | 1 [1-3]                              | 3 [1-5]                       | <b>&lt;.001</b> |
| Annualized relapse rate                     | 0.17 [0.08-0.41]                     | 0.29 [0.16-0.59]              | <b>0.006</b>    |
| Lesion sites                                |                                      |                               |                 |
| Optic nerve (optic neuritis)                | 21/50 (42.0)                         | 67/153 (43.8)                 | 0.871           |
| Cerebrum                                    | 39/51 (76.5)                         | 99/152 (65.1)                 | 0.166           |
| Cerebellum                                  | 11/49 (22.4)                         | 34/152 (22.4)                 | 1               |
| Brainstem                                   | 24/49 (49.0)                         | 83/152 (54.6)                 | 0.514           |
| Spinal cord                                 | 42/51 (82.4)                         | 115/151 (76.2)                | 0.438           |
| Patients with family history of MS or NMOSD | 0/51 (0)                             | 5/150 (3.3)                   | 0.332           |
| CSF IgG abnormality                         | 25/42 (59.5)                         | 73/127 (57.5)                 | 0.859           |
| Presence of OCBs                            | 16/39 (41.0)                         | 59/118 (50.0)                 | 0.360           |
| High IgG index (> 0.658)                    | 16/33 (48.5)                         | 44/108 (40.7)                 | 0.547           |
| Anti-AQP4 Ab positivity                     | 0/44 (0)                             | 1/129 (0.8)                   | 1               |
| EDSS score                                  | 3.0 [1.0-5.0]                        | 1.5 [1.0-3.5]                 | 0.053           |
| PI                                          | 0.24 [0.12-0.53]                     | 0.16 [0.05-0.34]              | <b>0.018</b>    |
| MSSS                                        | 4.83 [1.04-6.82]                     | 1.98 [0.51-4.46]              | <b>0.008</b>    |
| FS score*                                   |                                      |                               |                 |
| Visual functions                            | 0 [0-1]                              | 0 [0-2]                       | 0.335           |
| Brainstem functions                         | 0 [0-2]                              | 0 [0-2]                       | 0.815           |
| Pyramidal functions                         | 1 [0-3]                              | 1 [0-3]                       | 0.172           |
| Cerebellar functions                        | 0 [0-2]                              | 0 [0-3]                       | 0.382           |
| Sensory functions                           | 0 [0-2]                              | 0 [0-3]                       | 0.316           |
| Bowel and bladder functions                 | 0 [0-2]                              | 0 [0-1]                       | 0.528           |
| Cerebral functions                          | 0 [0-1]                              | 0 [0-1]                       | 0.695           |

|                                          |              |               |              |
|------------------------------------------|--------------|---------------|--------------|
| Episodes of                              |              |               |              |
| bilateral optic neuritis                 | 4/50 (8.0)   | 10/148 (6.8)  | 0.755        |
| transverse myelitis                      | 0/50 (0)     | 14/147 (9.5)  | <b>0.023</b> |
| MRI                                      |              |               |              |
| Huge brain lesion > 3cm                  | 1/51 (2.0)   | 3/151 (2.0)   | 1            |
| LESCL                                    | 0/51 (0)     | 3/153 (2.0)   | 0.575        |
| Benign course                            |              |               |              |
| EDSS ≤ 2 and disease duration ≥ 10y      | 8/25 (32.0)  | 41/84 (48.8)  | 0.172        |
| EDSS ≤ 3 and disease duration ≥ 10y      | 9/25 (36.0)  | 49/84 (58.3)  | 0.068        |
| AID/autoantibodies                       | 4/51 (7.8)   | 30/140 (21.4) | <b>0.033</b> |
| AID                                      |              |               |              |
| Sjögren syndrome                         | 0/51 (0)     | 1/138 (0.7)   | 1            |
| Thyroid diseases<br>(Basedow, Hashimoto) | 3/51 (5.9)   | 3/138 (2.2)   | 0.346        |
| Autoantibodies                           |              |               |              |
| ANA                                      | 0/51 (0)     | 14/136 (10.3) | <b>0.012</b> |
| Anti-SS-A / SS-B Ab                      | 0/51 (0)     | 3/136 (2.2)   | 0.563        |
| Anti-Tg / TPO / TSHR Ab                  | 4/51 (7.8)   | 9/136 (6.6)   | 0.753        |
| PSL/IS                                   |              |               |              |
| PSL                                      | 5/50 (10.0)  | 16/145 (11)   | 1            |
| IS                                       | 0/50 (0)     | 10/149 (6.7)  | 0.069        |
| DMD                                      |              |               |              |
| IFN-β                                    | 40/51 (78.4) | 98/153 (64.1) | 0.060        |
| fingolimod                               | 30/51 (58.8) | 56/151 (37.1) | <b>0.009</b> |

Values are median [interquartile ranges] or count (%). Bold values indicate significant differences.

\*In the section of functional system scores, values are median [10-90th percentile].

Ab, antibody; AID, autoimmune disease; ANA, anti-nuclear antibody; AQP4, aquaporin 4; CSF, cerebrospinal fluid; EDSS, expanded disability status scale; FS, functional system; IFN, interferon; IS, immunosuppressants; LESCL, longitudinally extensive spinal cord lesion; MS, multiple sclerosis; MSSS, multiple sclerosis severity score; NMOSD, neuromyelitis optica spectrum disorders; OCBs, oligoclonal IgG bands; PI, progression index; PPMS, primary progressive multiple sclerosis; PSL, prednisolone; RR, relapsing-remitting; SP, secondary progressive; Tg, thyroglobulin; TPO, thyroid peroxidase; TSHR, thyroid stimulating hormone receptor; y, years.

**Supplementary Table S6. Comparison of the clinical characteristics between MS patients with and without *HLA-DPB1\*03:01*.**

|                                             | <i>HLA-DPB1*03:01</i>      |                              | <i>p</i>     |
|---------------------------------------------|----------------------------|------------------------------|--------------|
|                                             | Positive<br>(n = 72)       | Negative<br>(n = 456)        |              |
| Female                                      | 51/72 (70.8)               | 317/456 (69.5)               | 0.891        |
| Age at registration, y                      | 41 [35-48]                 | 41 [34-49]                   | 0.579        |
| Course (RR/SP/PP)                           | 59/10/3<br>(81.9/13.9/4.2) | 379/60/16<br>(83.3/13.2/3.5) | 0.948        |
| Age at onset, y                             | 29 [23-37]                 | 30 [23-39]                   | 0.616        |
| Duration of disease, y                      | 10.3 [4.9-15.4]            | 9.0 [4.6-15]                 | 0.676        |
| Number of relapses                          | 2 [1-5]                    | 2 [1-4]                      | 0.217        |
| Annualized relapse rate                     | 0.27 [0.12-0.78]           | 0.26 [0.13-0.53]             | 0.391        |
| Lesion sites                                |                            |                              |              |
| Optic nerve (optic neuritis)                | 27/70 (38.6)               | 164/449 (36.5)               | 0.790        |
| Cerebrum                                    | 45/70 (64.3)               | 300/451 (66.5)               | 0.786        |
| Cerebellum                                  | 18/70 (25.7)               | 91/447 (20.4)                | 0.344        |
| Brainstem                                   | 40/69 (58.0)               | 214/448 (47.8)               | 0.122        |
| Spinal cord                                 | 52/69 (75.4)               | 344/451 (76.3)               | 0.880        |
| Patients with family history of MS or NMOSD | 0/71 (0)                   | 9/446 (2)                    | 0.618        |
| CSF IgG abnormality                         | 40/63 (63.5)               | 269/377 (71.4)               | 0.234        |
| Presence of OCBs                            | 34/59 (57.6)               | 228/352 (64.8)               | 0.308        |
| High IgG index (> 0.658)                    | 27/55 (49.1)               | 185/319 (58.0)               | 0.240        |
| Anti-AQP4 Ab positivity                     | 0/61 (0)                   | 4/393 (1)                    | 1            |
| EDSS score                                  | 2.0 [1.0-4.5]              | 2.0 [1.0-4.0]                | 0.694        |
| PI                                          | 0.23 [0.09-0.52]           | 0.22 [0.07-0.48]             | 0.659        |
| MSSS                                        | 2.44 [0.84-5.71]           | 2.65 [0.67-5.79]             | 0.864        |
| FS score*                                   |                            |                              |              |
| Visual functions                            | 0 [0-1]                    | 0 [0-1]                      | 0.282        |
| Brainstem functions                         | 0 [0-2]                    | 0 [0-2]                      | <b>0.035</b> |
| Pyramidal functions                         | 1 [0-3]                    | 1 [0-3]                      | 0.615        |
| Cerebellar functions                        | 0 [0-3]                    | 0 [0-2]                      | <b>0.004</b> |
| Sensory functions                           | 0 [0-2]                    | 0 [0-3]                      | 0.356        |
| Bowel and bladder functions                 | 0 [0-1]                    | 0 [0-1]                      | 0.597        |
| Cerebral functions                          | 0 [0-2]                    | 0 [0-1]                      | 0.098        |

|                                          |              |                |       |
|------------------------------------------|--------------|----------------|-------|
| Episodes of                              |              |                |       |
| bilateral optic neuritis                 | 5/69 (7.2)   | 22/447 (4.9)   | 0.388 |
| transverse myelitis                      | 5/68 (7.4)   | 36/445 (8.1)   | 1     |
| MRI                                      |              |                |       |
| Huge brain lesion > 3cm                  | 1/72 (1.4)   | 7/450 (1.6)    | 1     |
| LESCL                                    | 1/71 (1.4)   | 9/452 (2.0)    | 1     |
| Benign course                            |              |                |       |
| EDSS ≤ 2 and disease duration ≥ 10y      | 14/37 (37.8) | 87/197 (44.2)  | 0.588 |
| EDSS ≤ 3 and disease duration ≥ 10y      | 18/37 (48.6) | 109/197 (55.3) | 0.477 |
| AID/autoantibodies                       | 12/66 (18.2) | 65/428 (15.2)  | 0.584 |
| AID                                      | 3/65 (4.6)   | 28/426 (6.6)   | 0.784 |
| Sjögren syndrome                         | 0/65 (0)     | 7/426 (1.6)    | 0.602 |
| Thyroid diseases<br>(Basedow, Hashimoto) | 2/65 (3.1)   | 13/426 (3.1)   | 1     |
| Autoantibodies                           | 11/65 (16.9) | 55/419 (13.1)  | 0.437 |
| ANA                                      | 6/65 (9.2)   | 20/419 (4.8)   | 0.142 |
| Anti-SS-A / SS-B Ab                      | 1/65 (1.5)   | 13/419 (3.1)   | 0.705 |
| Anti-Tg / TPO / TSHR Ab                  | 4/65 (6.2)   | 22/419 (5.3)   | 0.767 |
| PSL/IS                                   | 9/71 (12.7)  | 60/455 (13.2)  | 1     |
| PSL                                      | 8/70 (11.4)  | 49/439 (11.2)  | 1     |
| IS                                       | 4/70 (5.7)   | 20/446 (4.5)   | 0.552 |
| DMD                                      | 63/72 (87.5) | 396/456 (86.8) | 1     |
| IFN-β                                    | 51/72 (70.8) | 310/456 (68.0) | 0.684 |
| fingolimod                               | 23/71 (32.4) | 194/454 (42.7) | 0.120 |

Values are median [interquartile ranges] or count (%). Bold values indicate significant differences.

\*In the section of functional system scores, values are median [10-90th percentile].

Ab, antibody; AID, autoimmune disease; ANA, anti-nuclear antibody; AQP4, aquaporin 4; CSF, cerebrospinal fluid; EDSS, expanded disability status scale; FS, functional system; IFN, interferon; IS, immunosuppressants; LESCL, longitudinally extensive spinal cord lesion; MS, multiple sclerosis; MSSS, multiple sclerosis severity score; NMOSD, neuromyelitis optica spectrum disorders; OCBs, oligoclonal IgG bands; PI, progression index; PP, primary progressive; PSL, prednisolone; RR, relapsing-remitting; SP, secondary progressive; Tg, thyroglobulin; TPO, thyroid peroxidase; TSHR, thyroid stimulating hormone receptor; y, years.

**Supplementary Table S7. Comparison of the clinical characteristics between MS patients with and without *HLA-DRB1\*01:01*.**

|                                             | <i>HLA-DRB1*01:01</i>     |                              | <i>p</i>     |
|---------------------------------------------|---------------------------|------------------------------|--------------|
|                                             | Positive<br>(n = 29)      | Negative<br>(n = 499)        |              |
| Female                                      | 13/29 (44.8)              | 355/499 (71.1)               | <b>0.006</b> |
| Age at registration, y                      | 40 [35-50]                | 41 [34-49]                   | 0.705        |
| Course (RR/SP/PP)                           | 24/3/2<br>(82.8/10.3/6.9) | 414/67/17<br>(83.1/13.5/3.4) | 0.621        |
| Age at onset, y                             | 35 [23-43]                | 30 [23-38]                   | 0.257        |
| Duration of disease, y                      | 8.6 [3.7-14.9]            | 9.1 [4.6-15.1]               | 0.701        |
| Number of relapses                          | 1 [1-6]                   | 2 [1-4]                      | 0.580        |
| Annualized relapse rate                     | 0.33 [0.06-0.56]          | 0.26 [0.13-0.55]             | 0.627        |
| Lesion sites                                |                           |                              |              |
| Optic nerve (optic neuritis)                | 8/28 (28.6)               | 183/491 (37.3)               | 0.424        |
| Cerebrum                                    | 17/28 (60.7)              | 328/493 (66.5)               | 0.542        |
| Cerebellum                                  | 5/28 (17.9)               | 104/489 (21.3)               | 0.814        |
| Brainstem                                   | 15/28 (53.6)              | 239/489 (48.9)               | 0.700        |
| Spinal cord                                 | 16/28 (57.1)              | 380/492 (77.2)               | <b>0.022</b> |
| Patients with family history of MS or NMOSD | 0/29 (0)                  | 9/488 (1.8)                  | 1            |
| CSF IgG abnormality                         | 13/23 (56.5)              | 296/417 (71.0)               | 0.161        |
| Presence of OCBs                            | 13/22 (59.1)              | 249/389 (64.0)               | 0.653        |
| High IgG index (> 0.658)                    | 8/19 (42.1)               | 204/355 (57.5)               | 0.236        |
| Anti-AQP4 Ab positivity                     | 0/24 (0)                  | 4/430 (0.9)                  | 1            |
| EDSS score                                  | 2.0 [1.0-3.5]             | 2.0 [1.0-4.0]                | 0.642        |
| PI                                          | 0.21 [0.08-0.39]          | 0.22 [0.07-0.49]             | 0.718        |
| MSSS                                        | 2.70 [0.70-3.67]          | 2.65 [0.67-5.87]             | 0.561        |
| FS score*                                   |                           |                              |              |
| Visual functions                            | 0 [0-0]                   | 0 [0-1]                      | 0.423        |
| Brainstem functions                         | 0 [0-1]                   | 0 [0-2]                      | 0.153        |
| Pyramidal functions                         | 1 [0-3]                   | 1 [0-3]                      | 0.431        |
| Cerebellar functions                        | 0 [0-2]                   | 0 [0-2]                      | 0.601        |
| Sensory functions                           | 0 [0-2]                   | 0 [0-2]                      | <b>0.048</b> |
| Bowel and bladder functions                 | 0 [0-2]                   | 0 [0-1]                      | 0.415        |
| Cerebral functions                          | 0 [0-0]                   | 0 [0-1]                      | 0.174        |

|                                          |              |                |       |
|------------------------------------------|--------------|----------------|-------|
| Episodes of                              |              |                |       |
| bilateral optic neuritis                 | 3/28 (10.7)  | 24/488 (4.9)   | 0.175 |
| transverse myelitis                      | 0/29 (0)     | 41/484 (8.5)   | 0.155 |
| MRI                                      |              |                |       |
| Huge brain lesion > 3cm                  | 0/29 (0)     | 8/493 (1.6)    | 1     |
| LESCL                                    | 0/29 (0)     | 10/494 (2.0)   | 1     |
| Benign course                            |              |                |       |
| EDSS ≤ 2 and disease duration ≥ 10y      | 3/11 (27.3)  | 98/223 (43.9)  | 0.358 |
| EDSS ≤ 3 and disease duration ≥ 10y      | 5/11 (45.5)  | 122/223 (54.7) | 0.555 |
| AID/autoantibodies                       | 6/26 (23.1)  | 71/468 (15.2)  | 0.270 |
| AID                                      | 4/26 (15.4)  | 27/465 (5.8)   | 0.073 |
| Sjögren syndrome                         | 0/26 (0)     | 7/465 (1.5)    | 1     |
| Thyroid diseases<br>(Basedow, Hashimoto) | 1/26 (3.8)   | 14/465 (3.0)   | 0.563 |
| Autoantibodies                           | 3/25 (12.0)  | 63/459 (13.7)  | 1     |
| ANA                                      | 1/25 (4.0)   | 25/459 (5.4)   | 1     |
| Anti-SS-A / SS-B Ab                      | 0/25 (0)     | 14/459 (3.1)   | 1     |
| Anti-Tg / TPO / TSHR Ab                  | 1/25 (4.0)   | 25/459 (5.4)   | 1     |
| PSL/IS                                   | 4/29 (13.8)  | 65/497 (13.1)  | 0.783 |
| PSL                                      | 2/28 (7.1)   | 55/481 (11.4)  | 0.757 |
| IS                                       | 3/28 (10.7)  | 21/488 (4.3)   | 0.135 |
| DMD                                      | 22/29 (75.9) | 437/499 (87.6) | 0.085 |
| IFN-β                                    | 17/29 (58.6) | 344/499 (68.9) | 0.304 |
| fingolimod                               | 11/28 (39.3) | 206/497 (41.4) | 1     |

Values are median [interquartile ranges] or count (%). Bold values indicate significant differences.

\*In the section of functional system scores, values are median [10-90th percentile].

Ab, antibody; AID, autoimmune disease; ANA, anti-nuclear antibody; AQP4, aquaporin 4; CSF, cerebrospinal fluid; EDSS, expanded disability status scale; FS, functional system; IFN, interferon; IS, immunosuppressants; LESCL, longitudinally extensive spinal cord lesion; MS, multiple sclerosis; MSSS, multiple sclerosis severity score; NMOSD, neuromyelitis optica spectrum disorders; OCBs, oligoclonal IgG bands; PI, progression index; PP, primary progressive; PSL, prednisolone; RR, relapsing-remitting; SP, secondary progressive; Tg, thyroglobulin; TPO, thyroid peroxidase; TSHR, thyroid stimulating hormone receptor; y, years.

**Supplementary Table S8. Comparison of the clinical characteristics between MS patients with and without *HLA-DRB1\*09:01*.**

|                                             | <i>HLA-DRB1*09:01</i>    |                              | <i>p</i>     |
|---------------------------------------------|--------------------------|------------------------------|--------------|
|                                             | Positive<br>(n = 76)     | Negative<br>(n = 452)        |              |
| Female                                      | 56/76 (73.7)             | 312/452 (69.0)               | 0.500        |
| Age at registration, y                      | 43 [33-50]               | 41 [34-49]                   | 0.664        |
| Course (RR/SP/PP)                           | 67/5/3<br>(89.3/6.7/4.0) | 371/65/16<br>(82.1/14.4/3.5) | 0.145        |
| Age at onset, y                             | 31 [23-39]               | 30 [23-38]                   | 0.437        |
| Duration of disease, y                      | 9.0 [4.4-15.0]           | 9.1 [4.7-15.1]               | 0.983        |
| Number of relapses                          | 2 [1-3]                  | 2 [1-4]                      | 0.062        |
| Annualized relapse rate                     | 0.23 [0.11-0.43]         | 0.28 [0.14-0.58]             | <b>0.047</b> |
| Lesion sites                                |                          |                              |              |
| Optic nerve (optic neuritis)                | 26/74 (35.1)             | 165/445 (37.1)               | 0.796        |
| Cerebrum                                    | 43/74 (58.1)             | 302/447 (67.6)               | 0.114        |
| Cerebellum                                  | 11/73 (15.1)             | 98/444 (22.1)                | 0.216        |
| Brainstem                                   | 24/72 (33.3)             | 230/445 (51.7)               | <b>0.005</b> |
| Spinal cord                                 | 52/74 (70.3)             | 344/446 (77.1)               | 0.238        |
| Patients with family history of MS or NMOSD | 1/74 (1.4)               | 8/443 (1.8)                  | 1            |
| CSF IgG abnormality                         | 43/63 (68.3)             | 266/377 (70.6)               | 0.766        |
| Presence of OCBs                            | 34/55 (61.8)             | 228/356 (64)                 | 0.765        |
| High IgG index (> 0.658)                    | 32/51 (62.7)             | 180/323 (55.7)               | 0.366        |
| Anti-AQP4 Ab positivity                     | 0/65 (0)                 | 4/389 (1.0)                  | 1            |
| EDSS score                                  | 1.8 [1.0-3.0]            | 2.0 [1.0-4.0]                | 0.434        |
| PI                                          | 0.21 [0.07-0.49]         | 0.22 [0.07-0.49]             | 0.913        |
| MSSS                                        | 2.19 [0.66-5.38]         | 2.72 [0.67-5.87]             | 0.412        |
| FS score*                                   |                          |                              |              |
| Visual functions                            | 0 [0-0]                  | 0 [0-1]                      | 0.414        |
| Brainstem functions                         | 0 [0-1]                  | 0 [0-2]                      | 0.273        |
| Pyramidal functions                         | 1 [0-3]                  | 1 [0-3]                      | 0.062        |
| Cerebellar functions                        | 0 [0-2]                  | 0 [0-2]                      | 0.131        |
| Sensory functions                           | 1 [0-2]                  | 0 [0-3]                      | 0.355        |
| Bowel and bladder functions                 | 0 [0-1]                  | 0 [0-2]                      | <b>0.015</b> |
| Cerebral functions                          | 0 [0-0]                  | 0 [0-1]                      | 0.242        |

|                                          |              |                |       |
|------------------------------------------|--------------|----------------|-------|
| Episodes of                              |              |                |       |
| bilateral optic neuritis                 | 3/74 (4.1)   | 24/442 (5.4)   | 0.783 |
| transverse myelitis                      | 6/73 (8.2)   | 35/440 (8.0)   | 1     |
| MRI                                      |              |                |       |
| Huge brain lesion > 3cm                  | 3/76 (3.9)   | 5/446 (1.1)    | 0.096 |
| LESCL                                    | 2/75 (2.7)   | 8/448 (1.8)    | 0.642 |
| Benign course                            |              |                |       |
| EDSS ≤ 2 and disease duration ≥ 10y      | 16/34 (47.1) | 85/200 (42.5)  | 0.709 |
| EDSS ≤ 3 and disease duration ≥ 10y      | 23/34 (67.6) | 104/200 (52.0) | 0.098 |
| AID/autoantibodies                       | 8/69 (11.6)  | 69/425 (16.2)  | 0.375 |
| AID                                      | 3/68 (4.4)   | 28/423 (6.6)   | 0.602 |
| Sjögren syndrome                         | 1/68 (1.5)   | 6/423 (1.4)    | 1     |
| Thyroid diseases<br>(Basedow, Hashimoto) | 2/68 (2.9)   | 13/423 (3.1)   | 1     |
| Autoantibodies                           | 7/69 (10.1)  | 59/415 (14.2)  | 0.450 |
| ANA                                      | 3/69 (4.3)   | 23/415 (5.5)   | 1     |
| Anti-SS-A / SS-B Ab                      | 1/69 (1.4)   | 13/415 (3.1)   | 0.704 |
| Anti-Tg / TPO / TSHR Ab                  | 2/69 (2.9)   | 24/415 (5.8)   | 0.561 |
| PSL/IS                                   | 6/75 (8.0)   | 63/451 (14.0)  | 0.196 |
| PSL                                      | 5/73 (6.8)   | 52/436 (11.9)  | 0.235 |
| IS                                       | 3/75 (4.0)   | 21/441 (4.8)   | 1     |
| DMD                                      | 64/76 (84.2) | 395/452 (87.4) | 0.462 |
| IFN-β                                    | 46/76 (60.5) | 315/452 (69.7) | 0.142 |
| fingolimod                               | 31/76 (40.8) | 186/449 (41.4) | 1     |

Values are median [interquartile ranges] or count (%). Bold values indicate significant differences.

\*In the section of functional system scores, values are median [10-90th percentile].

Ab, antibody; AID, autoimmune disease; ANA, anti-nuclear antibody; AQP4, aquaporin 4; CSF, cerebrospinal fluid; EDSS, expanded disability status scale; FS, functional system; IFN, interferon; IS, immunosuppressants; LESCL, longitudinally extensive spinal cord lesion; MS, multiple sclerosis; MSSS, multiple sclerosis severity score; NMOSD, neuromyelitis optica spectrum disorders; OCBs, oligoclonal IgG bands; PI, progression index; PP, primary progressive; PSL, prednisolone; RR, relapsing-remitting; SP, secondary progressive; Tg, thyroglobulin; TPO, thyroid peroxidase; TSHR, thyroid stimulating hormone receptor; y, years.

**Supplementary Table S9. Comparison of the clinical characteristics between MS patients with and without *HLA-DRB1\*13:02*.**

|                                             | <i>HLA-DRB1*13:02</i>        |                         | <i>p</i>     |
|---------------------------------------------|------------------------------|-------------------------|--------------|
|                                             | Positive<br>(n = 15)         | Negative<br>(n = 513)   |              |
| Female                                      | 13/15 (86.7)                 | 355/513 (69.2)          | 0.252        |
| Age at registration, y                      | 49 [38-54]                   | 41 [34-49]              | 0.041        |
| Course (RR/SP/PP)                           | 425/68/19<br>(83.0/13.3/3.7) | 13/2/0<br>(86.7/13.3/0) | 0.571        |
| Age at onset, y                             | 33 [28-42]                   | 30 [23-38]              | 0.153        |
| Duration of disease, y                      | 9.6 [6.4-15.7]               | 9.1 [4.6-15.1]          | 0.401        |
| Number of relapses                          | 2 [1-3]                      | 2 [1-4]                 | 0.791        |
| Annualized relapse rate                     | 0.19 [0.09-0.42]             | 0.27 [0.13-0.56]        | 0.138        |
| Lesion sites                                |                              |                         |              |
| Optic nerve (optic neuritis)                | 5/15 (33.3)                  | 186/504 (36.9)          | 1            |
| Cerebrum                                    | 9/14 (64.3)                  | 336/507 (66.3)          | 1            |
| Cerebellum                                  | 2/14 (14.3)                  | 107/503 (21.3)          | 0.744        |
| Brainstem                                   | 3/14 (21.4)                  | 251/503 (49.9)          | 0.055        |
| Spinal cord                                 | 8/15 (53.3)                  | 388/505 (76.8)          | 0.058        |
| Patients with family history of MS or NMOSD | 0/13 (0)                     | 9/504 (1.8)             | 1            |
| CSF IgG abnormality                         | 4/11 (36.4)                  | 305/429 (71.1)          | <b>0.019</b> |
| Presence of OCBs                            | 2/11 (18.2)                  | 260/400 (65.0)          | <b>0.002</b> |
| High IgG index (> 0.658)                    | 3/8 (37.5)                   | 209/366 (57.1)          | 0.300        |
| Anti-AQP4 Ab positivity                     | 0/12 (0)                     | 4/442 (0.9)             | 1            |
| EDSS score                                  | 1.5 [0.0-3.5]                | 2.0 [1.0-4.0]           | 0.440        |
| PI                                          | 0.16 [0.00-0.44]             | 0.22 [0.07-0.49]        | 0.196        |
| MSSS                                        | 1.45 [0.24-5.75]             | 2.70 [0.67-5.79]        | 0.182        |
| FS score*                                   |                              |                         |              |
| Visual functions                            | 0 [0-1]                      | 0 [0-1]                 | 0.550        |
| Brainstem functions                         | 0 [0-1]                      | 0 [0-2]                 | 0.137        |
| Pyramidal functions                         | 0 [0-4]                      | 1 [0-3]                 | 0.592        |
| Cerebellar functions                        | 0 [0-2]                      | 0 [0-2]                 | 0.651        |
| Sensory functions                           | 0 [0-2]                      | 0 [0-3]                 | 0.863        |
| Bowel and bladder functions                 | 0 [0-1]                      | 0 [0-1]                 | 0.329        |
| Cerebral functions                          | 0 [0-0]                      | 0 [0-1]                 | 0.163        |

|                                          |              |                |       |
|------------------------------------------|--------------|----------------|-------|
| Episodes of                              |              |                |       |
| bilateral optic neuritis                 | 0/15 (0)     | 27/501 (5.4)   | 1     |
| transverse myelitis                      | 0/14 (0)     | 41/499 (8.2)   | 0.616 |
| MRI                                      |              |                |       |
| Huge brain lesion > 3cm                  | 1/15 (6.7)   | 7/507 (1.4)    | 0.209 |
| LESCL                                    | 0/15 (0)     | 10/508 (2.0)   | 1     |
| Benign course                            |              |                |       |
| EDSS ≤ 2 and disease duration ≥ 10y      | 3/7 (42.9)   | 98/227 (43.2)  | 1     |
| EDSS ≤ 3 and disease duration ≥ 10y      | 5/7 (71.4)   | 122/227 (53.7) | 0.458 |
| AID/autoantibodies                       | 4/14 (28.6)  | 73/480 (15.2)  | 0.250 |
| AID                                      | 3/14 (21.4)  | 28/477 (5.9)   | 0.052 |
| Sjögren syndrome                         | 0/14 (0)     | 7/477 (1.5)    | 1     |
| Thyroid diseases<br>(Basedow, Hashimoto) | 1/14 (7.1)   | 14/477 (2.9)   | 0.356 |
| Autoantibodies                           | 1/12 (8.3)   | 65/472 (13.8)  | 1     |
| ANA                                      | 0/12 (0)     | 26/472 (5.5)   | 1     |
| Anti-SS-A / SS-B Ab                      | 1/12 (8.3)   | 13/472 (2.8)   | 0.300 |
| Anti-Tg / TPO / TSHR Ab                  | 0/12 (0)     | 26/472 (5.5)   | 1     |
| PSL/IS                                   | 0/15 (0)     | 69/511 (13.5)  | 0.238 |
| PSL                                      | 0/12 (0)     | 57/497 (11.5)  | 0.378 |
| IS                                       | 0/15 (0)     | 24/501 (4.8)   | 1     |
| DMD                                      | 13/15 (86.7) | 446/513 (86.9) | 1     |
| IFN-β                                    | 9/15 (60.0)  | 352/513 (68.6) | 0.574 |
| fingolimod                               | 5/15 (33.3)  | 212/510 (41.6) | 0.603 |

Values are median [interquartile ranges] or count (%). Bold values indicate significant differences.

\*In the section of functional system scores, values are median [10-90th percentile].

Ab, antibody; AID, autoimmune disease; ANA, anti-nuclear antibody; AQP4, aquaporin 4; CSF, cerebrospinal fluid; EDSS, expanded disability status scale; FS, functional system; IFN, interferon; IS, immunosuppressants; LESCL, longitudinally extensive spinal cord lesion; MS, multiple sclerosis; MSSS, multiple sclerosis severity score; NMOSD, neuromyelitis optica spectrum disorders; OCBs, oligoclonal IgG bands; PI, progression index; PP, primary progressive; PSL, prednisolone; RR, relapsing-remitting; SP, secondary progressive; Tg, thyroglobulin; TPO, thyroid peroxidase; TSHR, thyroid stimulating hormone receptor; y, years.

**Supplementary Table S10. Comparison of the clinical characteristics between MS patients with and without *HLA-DPB1\*04:01*.**

|                                             | <i>HLA-DPB1*04:01</i>  |                              | <i>p</i>     |
|---------------------------------------------|------------------------|------------------------------|--------------|
|                                             | Positive<br>(n = 18)   | Negative<br>(n = 510)        |              |
| Female                                      | 15/18 (83.3)           | 353/510 (69.2)               | 0.297        |
| Age at registration, y                      | 42 [32-51]             | 41 [35-49]                   | 0.907        |
| Course (RR/SP/PP)                           | 17/1/0<br>(94.4/5.6/0) | 421/69/19<br>(82.7/13.6/3.7) | 0.264        |
| Age at onset, y                             | 26 [24-39]             | 30 [23-38]                   | 0.611        |
| Duration of disease, y                      | 8.0 [6.0-16.5]         | 9.1 [4.6-15.1]               | 0.778        |
| Number of relapses                          | 3 [1-4]                | 2 [1-4]                      | 0.461        |
| Annualized relapse rate                     | 0.23 [0.15-0.5]        | 0.27 [0.13-0.55]             | 0.817        |
| Lesion sites                                |                        |                              |              |
| Optic nerve (optic neuritis)                | 5/18 (27.8)            | 186/501 (37.1)               | 0.468        |
| Cerebrum                                    | 10/18 (55.6)           | 335/503 (66.6)               | 0.323        |
| Cerebellum                                  | 4/18 (22.2)            | 105/499 (21.0)               | 1            |
| Brainstem                                   | 6/18 (33.3)            | 248/499 (49.7)               | 0.231        |
| Spinal cord                                 | 14/18 (77.8)           | 382/502 (76.1)               | 1            |
| Patients with family history of MS or NMOSD | 0/17 (0)               | 9/500 (1.8)                  | 1            |
| CSF IgG abnormality                         | 7/15 (46.7)            | 302/425 (71.1)               | 0.079        |
| Presence of OCBs                            | 4/15 (26.7)            | 258/396 (65.2)               | <b>0.004</b> |
| High IgG index (> 0.658)                    | 4/13 (30.8)            | 208/361 (57.6)               | 0.084        |
| Anti-AQP4 Ab positivity                     | 0/16 (0)               | 4/438 (0.9)                  | 1            |
| EDSS score                                  | 2.0 [1.0-3.8]          | 2.0 [1.0-4.0]                | 0.953        |
| PI                                          | 0.23 [0.03-0.50]       | 0.22 [0.07-0.49]             | 0.809        |
| MSSS                                        | 2.63 [0.25-6.64]       | 2.65 [0.67-5.75]             | 0.956        |
| FS score*                                   |                        |                              |              |
| Visual functions                            | 0 [0-0]                | 0 [0-1]                      | 0.444        |
| Brainstem functions                         | 0 [0-2]                | 0 [0-2]                      | 0.548        |
| Pyramidal functions                         | 1 [0-4]                | 1 [0-3]                      | 0.691        |
| Cerebellar functions                        | 0 [0-2]                | 0 [0-2]                      | 0.776        |
| Sensory functions                           | 0 [0-3]                | 0 [0-2]                      | 0.943        |
| Bowel and bladder functions                 | 0 [0-0]                | 0 [0-1]                      | 0.072        |
| Cerebral functions                          | 0 [0-0]                | 0 [0-1]                      | 0.125        |

|                                          |              |                |              |
|------------------------------------------|--------------|----------------|--------------|
| Episodes of                              |              |                |              |
| bilateral optic neuritis                 | 0/17 (0)     | 27/499 (5.4)   | 1            |
| transverse myelitis                      | 0/18 (0)     | 41/495 (8.3)   | 0.384        |
| MRI                                      |              |                |              |
| Huge brain lesion > 3cm                  | 1/18 (5.6)   | 7/504 (1.4)    | 0.246        |
| LESCL                                    | 2/18 (11.1)  | 8/505 (1.6)    | <b>0.043</b> |
| Benign course                            |              |                |              |
| EDSS ≤ 2 and disease duration ≥ 10y      | 3/7 (42.9)   | 98/227 (43.2)  | 1            |
| EDSS ≤ 3 and disease duration ≥ 10y      | 4/7 (57.1)   | 123/227 (54.2) | 1            |
| AID/autoantibodies                       | 1/18 (5.6)   | 76/476 (16.0)  | 0.332        |
| AID                                      |              |                |              |
| Sjögren syndrome                         | 0/18 (0)     | 7/473 (1.5)    | 1            |
| Thyroid diseases<br>(Basedow, Hashimoto) | 0/18 (0)     | 15/473 (3.2)   | 1            |
| Autoantibodies                           |              |                |              |
| ANA                                      | 1/18 (5.6)   | 65/466 (13.9)  | 0.490        |
| Anti-SS-A / SS-B Ab                      | 1/18 (5.6)   | 25/466 (5.4)   | 1            |
| Anti-Tg / TPO / TSHR Ab                  | 0/18 (0)     | 14/466 (3.0)   | 1            |
| Anti-Tg / TPO / TSHR Ab                  | 0/18 (0)     | 26/466 (5.6)   | 0.614        |
| PSL/IS                                   |              |                |              |
| PSL                                      | 2/18 (11.1)  | 67/508 (13.2)  | 1            |
| IS                                       | 2/15 (13.3)  | 55/494 (11.1)  | 0.680        |
| IS                                       |              |                |              |
| IS                                       | 1/18 (5.6)   | 23/498 (4.6)   | 0.582        |
| DMD                                      |              |                |              |
| IFN-β                                    | 16/18 (88.9) | 443/510 (86.9) | 1            |
| IFN-β                                    | 11/18 (61.1) | 350/510 (68.6) | 0.607        |
| fingolimod                               | 6/18 (33.3)  | 211/507 (41.6) | 0.628        |

Values are median [interquartile ranges] or count (%). Bold values indicate significant differences.

\*In the section of functional system scores, values are median [10-90th percentile].

Ab, antibody; AID, autoimmune disease; ANA, anti-nuclear antibody; AQP4, aquaporin 4; CSF, cerebrospinal fluid; EDSS, expanded disability status scale; FS, functional system; IFN, interferon; IS, immunosuppressants; LESCL, longitudinally extensive spinal cord lesion; MS, multiple sclerosis; MSSS, multiple sclerosis severity score; NMOSD, neuromyelitis optica spectrum disorders; OCBs, oligoclonal IgG bands; PI, progression index; PP, primary progressive; PSL, prednisolone; RR, relapsing-remitting; SP, secondary progressive; Tg, thyroglobulin; TPO, thyroid peroxidase; TSHR, thyroid stimulating hormone receptor; y, years.

**Supplementary Table S11. Comparison of the clinical characteristics between NMOSD patients with and without *HLA-DRB1\*08:02*.**

|                                             | <i>HLA-DRB1*08:02</i> |                       | <i>p</i>     |
|---------------------------------------------|-----------------------|-----------------------|--------------|
|                                             | Positive<br>(n = 30)  | Negative<br>(n = 135) |              |
| Female                                      | 24/30 (80.0)          | 119/135 (88.1)        | 0.242        |
| Age at registration, y                      | 56 [46-62]            | 52 [42-63]            | 0.914        |
| Age at onset, y                             | 48 [39-53]            | 44 [33-54]            | 0.410        |
| Duration of disease, y                      | 7.2 [4.3-10.3]        | 6.9 [3.2-13.7]        | 0.881        |
| Number of relapses                          | 2 [1-4]               | 2 [1-5]               | 0.474        |
| Annualized relapse rate                     | 0.32 [0.21-0.56]      | 0.43 [0.21-0.8]       | 0.502        |
| Lesion sites                                |                       |                       |              |
| Optic nerve (optic neuritis)                | 15/30 (50.0)          | 83/134 (61.9)         | 0.303        |
| Cerebrum                                    | 6/30 (20.0)           | 33/133 (24.8)         | 0.644        |
| Cerebellum                                  | 2/30 (6.7)            | 12/133 (9.0)          | 1            |
| Brainstem                                   | 8/30 (26.7)           | 55/133 (41.4)         | 0.152        |
| Spinal cord                                 | 25/30 (83.3)          | 113/134 (84.3)        | 1            |
| Patients with family history of MS or NMOSD | 1/30 (3.3)            | 4/131 (3.1)           | 1            |
| CSF IgG abnormality                         | 6/26 (23.1)           | 49/111 (44.1)         | 0.074        |
| Presence of OCBs                            | 0/23 (0)              | 20/95 (21.1)          | <b>0.012</b> |
| High IgG index (> 0.658)                    | 6/23 (26.1)           | 40/99 (40.4)          | 0.239        |
| Anti-AQP4 Ab positivity                     | 30/30 (100)           | 125/133 (94.0)        | 0.353        |
| EDSS score                                  | 3.5 [2.0-6.0]         | 3.5 [2.0-5.5]         | 0.965        |
| PI                                          | 0.43 [0.29-0.86]      | 0.42 [0.23-0.94]      | 0.657        |
| FS score*                                   |                       |                       |              |
| Visual functions                            | 0 [0-4]               | 0 [0-5]               | 0.123        |
| Brainstem functions                         | 0 [0-1]               | 0 [0-1]               | 0.342        |
| Pyramidal functions                         | 2 [0-3]               | 2 [0-4]               | 0.307        |
| Cerebellar functions                        | 0 [0-0]               | 0 [0-1]               | 0.402        |
| Sensory functions                           | 2 [0-4]               | 1 [0-4]               | 0.190        |
| Bowel and bladder functions                 | 0 [0-4]               | 0 [0-2]               | 0.990        |
| Cerebral functions                          | 0 [0-0]               | 0 [0-0]               | 0.481        |
| Episodes of                                 |                       |                       |              |
| bilateral optic neuritis                    | 4/29 (13.8)           | 25/131 (19.1)         | 0.603        |
| transverse myelitis                         | 15/29 (51.7)          | 49/134 (36.6)         | 0.146        |

|                                          |              |                |              |
|------------------------------------------|--------------|----------------|--------------|
| MRI                                      |              |                |              |
| Huge brain lesion > 3cm                  | 2/30 (6.7)   | 5/135 (3.7)    | 0.612        |
| LESCL                                    | 21/29 (72.4) | 72/133 (54.1)  | 0.097        |
| Benign course                            |              |                |              |
| EDSS ≤ 2 and disease duration ≥ 10y      | 1/7 (14.3)   | 8/43 (18.6)    | 1            |
| EDSS ≤ 3 and disease duration ≥ 10y      | 3/7 (42.9)   | 10/43 (23.3)   | 0.357        |
| AID/autoantibodies                       | 17/28 (60.7) | 47/127 (37.0)  | <b>0.033</b> |
| AID                                      | 7/28 (25.0)  | 16/123 (13.0)  | 0.143        |
| Sjögren syndrome                         | 4/28 (14.3)  | 12/123 (9.8)   | 0.500        |
| Thyroid diseases<br>(Basedow, Hashimoto) | 2/28 (7.1)   | 1/123 (0.8)    | 0.089        |
| Autoantibodies                           | 16/27 (59.3) | 44/121 (36.4)  | <b>0.032</b> |
| ANA                                      | 9/27 (33.3)  | 20/121 (16.5)  | 0.061        |
| Anti-SS-A / SS-B Ab                      | 10/27 (37.0) | 21/121 (17.4)  | <b>0.035</b> |
| Anti-Tg / TPO / TSHR Ab                  | 3/27 (11.1)  | 11/121 (9.1)   | 0.721        |
| PSL/IS                                   | 28/30 (93.3) | 134/135 (99.3) | 0.085        |
| PSL                                      | 28/29 (96.6) | 129/134 (96.3) | 1            |
| IS                                       | 17/30 (56.7) | 94/134 (70.1)  | 0.195        |
| DMD                                      | 3/30 (10.0)  | 24/135 (17.8)  | 0.416        |
| IFN-β                                    | 3/30 (10.0)  | 24/135 (17.8)  | 0.416        |
| fingolimod                               | 1/30 (3.3)   | 0/134 (0)      | 0.183        |

Values are median [interquartile ranges] or count (%). Bold values indicate significant differences.

\*In the section of functional system scores, values are median [10-90th percentile].

Ab, antibody; AID, autoimmune disease; ANA, anti-nuclear antibody; AQP4, aquaporin 4; CSF, cerebrospinal fluid; EDSS, expanded disability status scale; FS, functional system; IFN, interferon; IS, immunosuppressants; LESCL, longitudinally extensive spinal cord lesion; MS = multiple sclerosis; NMOSD, neuromyelitis optica spectrum disorders; OCBs, oligoclonal IgG bands; PI, progression index; PSL, prednisolone; Tg, thyroglobulin; TPO, thyroid peroxidase; TSHR, thyroid stimulating hormone receptor; y, years.

**Supplementary Table S12. Comparison of the clinical characteristics between NMOSD patients with and without *HLA-DPB1\*05:01*.**

|                                             | <i>HLA-DPB1*05:01</i> |                      | <i>p</i>     |
|---------------------------------------------|-----------------------|----------------------|--------------|
|                                             | Positive<br>(n = 135) | Negative<br>(n = 30) |              |
| Female                                      | 118/135 (87.4)        | 25/30 (83.3)         | 0.557        |
| Age at registration, y                      | 53 [44-63]            | 50 [36-65]           | 0.621        |
| Age at onset, y                             | 45 [34-53]            | 45 [32-59]           | 0.642        |
| Duration of disease, y                      | 7.9 [4.1-13.1]        | 4.3 [1.5-8.6]        | <b>0.016</b> |
| Number of relapses                          | 3 [1-6]               | 1 [0-2]              | <b>0.001</b> |
| Annualized relapse rate                     | 0.43 [0.23-0.75]      | 0.24 [0-0.77]        | 0.155        |
| Lesion sites                                |                       |                      |              |
| Optic nerve (optic neuritis)                | 80/135 (59.3)         | 18/29 (62.1)         | 0.837        |
| Cerebrum                                    | 36/134 (26.9)         | 3/29 (10.3)          | 0.090        |
| Cerebellum                                  | 14/134 (10.4)         | 0/29 (0)             | 0.077        |
| Brainstem                                   | 53/134 (39.6)         | 10/29 (34.5)         | 0.678        |
| Spinal cord                                 | 115/135 (85.2)        | 23/29 (79.3)         | 0.412        |
| Patients with family history of MS or NMOSD | 5/132 (3.8)           | 0/29 (0)             | 0.586        |
| CSF IgG abnormality                         | 47/112 (42)           | 8/25 (32)            | 0.499        |
| Presence of OCBs                            | 19/99 (19.2)          | 1/19 (5.3)           | 0.191        |
| High IgG index (> 0.658)                    | 38/98 (38.8)          | 8/24 (33.3)          | 0.815        |
| Anti-AQP4 Ab positivity                     | 128/134 (95.5)        | 27/29 (93.1)         | 0.633        |
| EDSS score                                  | 3.5 [2.0-5.0]         | 3.5 [1.5-6.0]        | 0.894        |
| PI                                          | 0.40 [0.23-0.79]      | 0.83 [0.27-1.85]     | <b>0.034</b> |
| FS score*                                   |                       |                      |              |
| Visual functions                            | 0 [0-5]               | 0 [0-6]              | 0.896        |
| Brainstem functions                         | 0 [0-1]               | 0 [0-2]              | 0.860        |
| Pyramidal functions                         | 2 [0-3]               | 0 [0-4]              | 0.130        |
| Cerebellar functions                        | 0 [0-1]               | 0 [0-0]              | 0.454        |
| Sensory functions                           | 2 [0-4]               | 1 [0-4]              | 0.751        |
| Bowel and bladder functions                 | 0 [0-2]               | 0 [0-3]              | 0.544        |
| Cerebral functions                          | 0 [0-0]               | 0 [0-0]              | 0.915        |
| Episodes of                                 |                       |                      |              |
| bilateral optic neuritis                    | 23/131 (17.6)         | 6/29 (20.7)          | 0.790        |
| transverse myelitis                         | 56/133 (42.1)         | 8/30 (26.7)          | 0.149        |

|                                          |                |              |              |
|------------------------------------------|----------------|--------------|--------------|
| MRI                                      |                |              |              |
| Huge brain lesion > 3cm                  | 6/135 (4.4)    | 1/30 (3.3)   | 1            |
| LESCL                                    | 79/132 (59.8)  | 14/30 (46.7) | 0.222        |
| Benign course                            |                |              |              |
| EDSS ≤ 2 and disease duration ≥ 10y      | 8/44 (18.2)    | 1/6 (16.7)   | 1            |
| EDSS ≤ 3 and disease duration ≥ 10y      | 11/44 (25)     | 2/6 (33.3)   | 0.643        |
| AID/autoantibodies                       | 55/127 (43.3)  | 9/28 (32.1)  | 0.299        |
| AID                                      | 23/123 (18.7)  | 0/28 (0)     | <b>0.008</b> |
| Sjögren syndrome                         | 16/123 (13.0)  | 0/28 (0)     | <b>0.044</b> |
| Thyroid diseases<br>(Basedow, Hashimoto) | 3/123 (2.4)    | 0/28 (0)     | 1            |
| Autoantibodies                           | 51/121 (42.1)  | 9/27 (33.3)  | 0.517        |
| ANA                                      | 24/121 (19.8)  | 5/27 (18.5)  | 1            |
| Anti-SS-A / SS-B Ab                      | 30/121 (24.8)  | 1/27 (3.7)   | <b>0.016</b> |
| Anti-Tg / TPO / TSHR Ab                  | 11/121 (9.1)   | 3/27 (11.1)  | 0.721        |
| PSL/IS                                   | 133/135 (98.5) | 29/30 (96.7) | 0.455        |
| PSL                                      | 128/133 (96.2) | 29/30 (96.7) | 1            |
| IS                                       | 90/134 (67.2)  | 21/30 (70)   | 0.832        |
| DMD                                      | 25/135 (18.5)  | 2/30 (6.7)   | 0.171        |
| IFN-β                                    | 25/135 (18.5)  | 2/30 (6.7)   | 0.171        |
| fingolimod                               | 1/134 (0.7)    | 0/30 (0)     | 1            |

Values are median [interquartile ranges] or count (%). Bold values indicate significant differences.

\*In the section of functional system scores, values are median [10-90th percentile].

Ab, antibody; AID, autoimmune disease; ANA, anti-nuclear antibody; AQP4, aquaporin 4; CSF, cerebrospinal fluid; EDSS, expanded disability status scale; FS, functional system; IFN, interferon; IS, immunosuppressants; LESCL, longitudinally extensive spinal cord lesion; MS = multiple sclerosis; NMOSD, neuromyelitis optica spectrum disorders; OCBs, oligoclonal IgG bands; PI, progression index; PSL, prednisolone; Tg, thyroglobulin; TPO, thyroid peroxidase; TSHR, thyroid stimulating hormone receptor; y, years.

**Supplementary Table S13. Comparison of the clinical characteristics between NMOSD patients with and without *HLA-DRB1\*09:01*.**

|                                             | <i>HLA-DRB1*09:01</i> |                       | <i>p</i> |
|---------------------------------------------|-----------------------|-----------------------|----------|
|                                             | Positive<br>(n = 15)  | Negative<br>(n = 150) |          |
| Female                                      | 14/15 (93.3)          | 129/150 (86.0)        | 0.695    |
| Age at registration, y                      | 59 [49-65]            | 52 [43-62]            | 0.249    |
| Age at onset, y                             | 45 [31-56]            | 45 [33-53]            | 0.721    |
| Duration of disease, y                      | 7.3 [2.4-20.7]        | 7.0 [3.6-12.2]        | 0.723    |
| Number of relapses                          | 2 [1-13]              | 2 [1-5]               | 0.567    |
| Annualized relapse rate                     | 0.42 [0.14-1.18]      | 0.41 [0.21-0.74]      | 0.765    |
| Lesion sites                                |                       |                       |          |
| Optic nerve (optic neuritis)                | 9/15 (60.0)           | 89/149 (59.7)         | 1        |
| Cerebrum                                    | 4/15 (26.7)           | 35/148 (23.6)         | 0.757    |
| Cerebellum                                  | 0/15 (0)              | 14/148 (9.5)          | 0.367    |
| Brainstem                                   | 8/15 (53.3)           | 55/148 (37.2)         | 0.269    |
| Spinal cord                                 | 11/15 (73.3)          | 127/149 (85.2)        | 0.262    |
| Patients with family history of MS or NMOSD | 0/15 (0)              | 5/146 (3.4)           | 1        |
| CSF IgG abnormality                         | 7/13 (53.8)           | 48/124 (38.7)         | 0.375    |
| Presence of OCBs                            | 4/10 (40.0)           | 16/108 (14.8)         | 0.065    |
| High IgG index (> 0.658)                    | 5/9 (55.6)            | 41/113 (36.3)         | 0.295    |
| Anti-AQP4 Ab positivity                     | 13/14 (92.9)          | 142/149 (95.3)        | 0.521    |
| EDSS score                                  | 3.5 [1.5-7.0]         | 3.5 [2.0-5.5]         | 0.914    |
| PI                                          | 0.42 [0.24-0.55]      | 0.42 [0.23-0.95]      | 0.553    |
| FS score*                                   |                       |                       |          |
| Visual functions                            | 0 [0-5]               | 0 [0-5]               | 0.943    |
| Brainstem functions                         | 0 [0-1]               | 0 [0-1]               | 0.275    |
| Pyramidal functions                         | 1 [0-5]               | 2 [0-3]               | 0.917    |
| Cerebellar functions                        | 0 [0-1]               | 0 [0-1]               | 0.603    |
| Sensory functions                           | 2 [0-4]               | 1 [0-3]               | 0.323    |
| Bowel and bladder functions                 | 0 [0-4]               | 0 [0-2]               | 0.374    |
| Cerebral functions                          | 0 [0-2]               | 0 [0-0]               | 0.875    |
| Episodes of                                 |                       |                       |          |
| bilateral optic neuritis                    | 2/15 (13.3)           | 27/145 (18.6)         | 1        |
| transverse myelitis                         | 4/15 (26.7)           | 60/148 (40.5)         | 0.408    |

|                                          |              |                |              |
|------------------------------------------|--------------|----------------|--------------|
| MRI                                      |              |                |              |
| Huge brain lesion > 3cm                  | 2/15 (13.3)  | 5/150 (3.3)    | 0.124        |
| LESCL                                    | 10/15 (66.7) | 83/147 (56.5)  | 0.586        |
| Benign course                            |              |                |              |
| EDSS ≤ 2 and disease duration ≥ 10y      | 1/5 (20.0)   | 8/45 (17.8)    | 1            |
| EDSS ≤ 3 and disease duration ≥ 10y      | 1/5 (20.0)   | 12/45 (26.7)   | 1            |
| AID/autoantibodies                       | 5/13 (38.5)  | 59/142 (41.5)  | 1            |
| AID                                      | 5/13 (38.5)  | 18/138 (13.0)  | <b>0.030</b> |
| Sjögren syndrome                         | 4/13 (30.8)  | 12/138 (8.7)   | <b>0.034</b> |
| Thyroid diseases<br>(Basedow, Hashimoto) | 0/13 (0)     | 3/138 (2.2)    | 1            |
| Autoantibodies                           | 3/12 (25.0)  | 57/136 (41.9)  | 0.361        |
| ANA                                      | 2/12 (16.7)  | 27/136 (19.9)  | 1            |
| Anti-SS-A / SS-B Ab                      | 3/12 (25.0)  | 28/136 (20.6)  | 0.716        |
| Anti-Tg / TPO / TSHR Ab                  | 0/12 (0)     | 14/136 (10.3)  | 0.605        |
| PSL/IS                                   | 15/15 (100)  | 147/150 (98.0) | 1            |
| PSL                                      | 15/15 (100)  | 142/148 (95.9) | 1            |
| IS                                       | 11/14 (78.6) | 100/150 (66.7) | 0.552        |
| DMD                                      | 4/15 (26.7)  | 23/150 (15.3)  | 0.274        |
| IFN-β                                    | 4/15 (26.7)  | 23/150 (15.3)  | 0.274        |
| fingolimod                               | 0/15 (0)     | 1/149 (0.7)    | 1            |

Values are median [interquartile ranges] or count (%). Bold values indicate significant differences.

\*In the section of functional system scores, values are median [10-90th percentile].

Ab, antibody; AID, autoimmune disease; ANA, anti-nuclear antibody; AQP4, aquaporin 4; CSF, cerebrospinal fluid; EDSS, expanded disability status scale; FS, functional system; IFN, interferon; IS, immunosuppressants; LESCL, longitudinally extensive spinal cord lesion; MS = multiple sclerosis; NMOSD, neuromyelitis optica spectrum disorders; OCBs, oligoclonal IgG bands; PI, progression index; PSL, prednisolone; Tg, thyroglobulin; TPO, thyroid peroxidase; TSHR, thyroid stimulating hormone receptor; y, years.

**Supplementary Table S14. Clinical and genetic factors associated with EDSS scores in NMOSD.**

| EDSS score (ordinal scale)                   | Univariable |                 | Multivariable |              |
|----------------------------------------------|-------------|-----------------|---------------|--------------|
|                                              | Std $\beta$ | <i>p</i>        | Std $\beta$   | <i>p</i>     |
| Sex [female/male]                            | 0.063       | 0.418           | 0.006         | 0.944        |
| Age at onset (y)                             | 0.074       | 0.346           | 0.255         | <b>0.004</b> |
| Disease Duration (y)                         | 0.342       | <b>&lt;.001</b> | 0.260         | <b>0.008</b> |
| Number of relapses                           | 0.380       | <b>&lt;.001</b> | 0.284         | <b>0.004</b> |
| Episode(s) of bilateral optic neuritis [+/-] | 0.143       | 0.071           | 0.084         | 0.281        |
| LESCL [+/-]                                  | 0.189       | <b>0.016</b>    | 0.052         | 0.512        |
| AID/autoantibody [+/-]                       | -0.051      | 0.529           | -0.027        | 0.724        |
| PSL/IS [treated/non-treated]                 | -0.060      | 0.443           | -0.065        | 0.407        |
| <i>HLA-DPBI*05:01</i> [+/-]                  | -0.011      | 0.893           | -0.102        | 0.187        |

Significant correlations are in bold.

AID, autoimmune disease; EDSS, expanded disability status scale; IS, immunosuppressants; LESCL, longitudinally extensive spinal cord lesion; NMOSD, neuromyelitis optica spectrum disorders; PSL, prednisolone; Std, standardized; y, years.
